# Supplementary material for: A push–pull 4a,4b-dihydrophenanthrene
Source: Royal Society of Chemistry journal article supplement (doi:10.1039/b104510p), 2001-01-01
Supplement: b104510p.pdf [file b104510p.pdf]

Supporting Information for:

A push-pull 4a,4b-dihydrophenanthrene

Frederick D. Lewis,\* Todd L. Kurth, and Rajdeep S. Kalgutkar<sup>†</sup>

Department of Chemistry, Northwestern University, 2145 Sheridan Road,

Evanston, IL 60208 USA, email: lewis@chem.northwestern.edu

6 figures

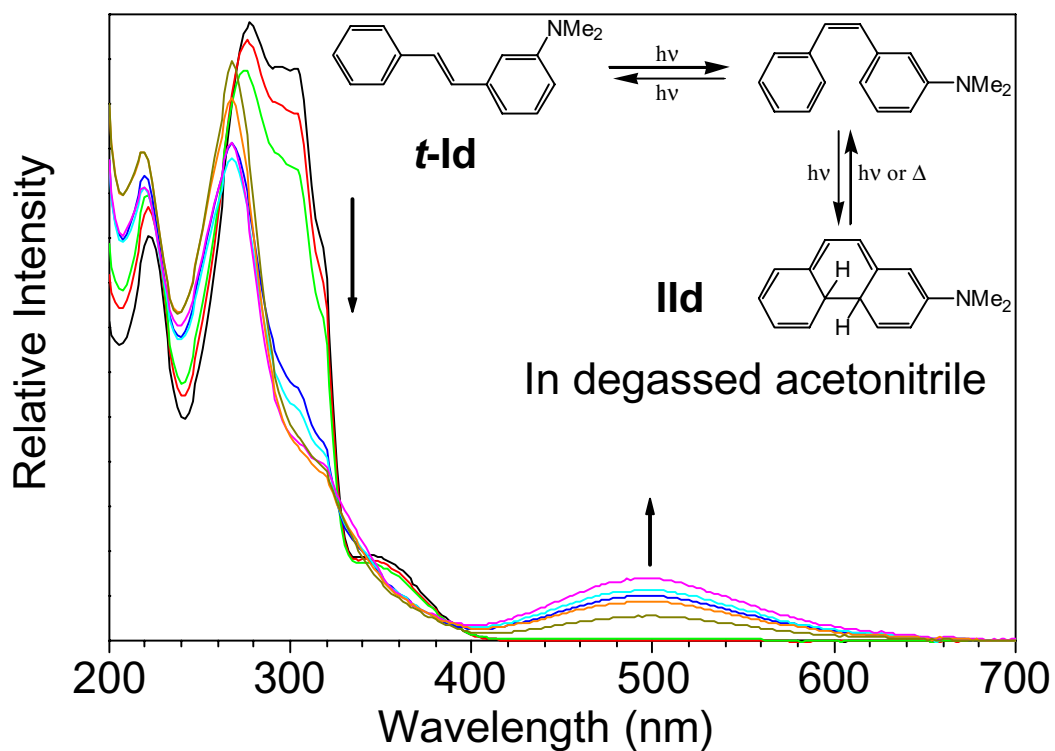

**Supporting Figure 1:** Data matrix for **Id**. Data was collected at arbitrary intervals of irradiation time and was not adjusted for parameters such as light intensity.

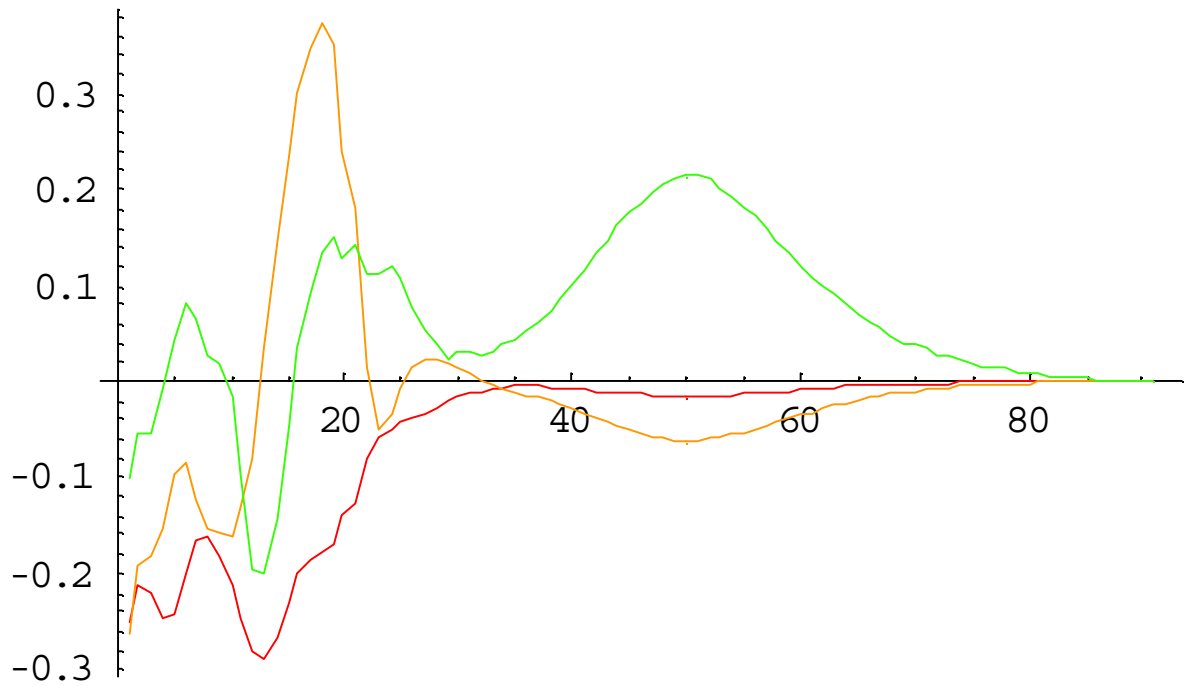

**Supporting Figure 2a:** Three main eigenvectors obtained from SVD of the data matrix. The abscissa is in the form of data points.

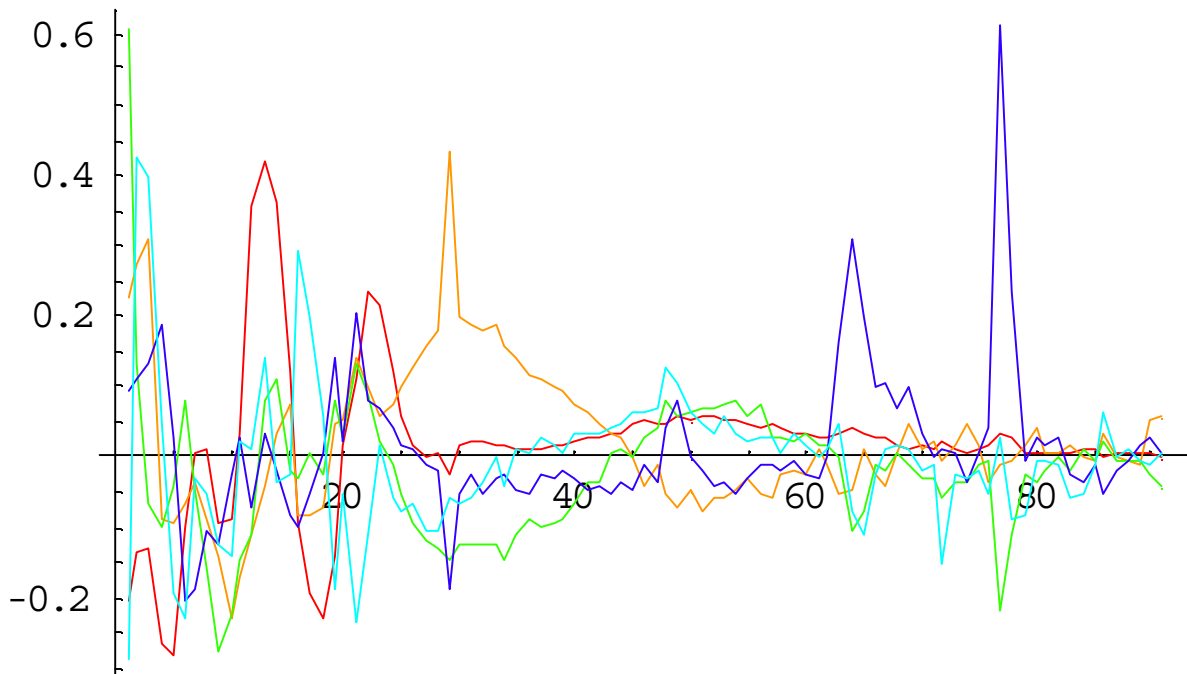

**Supporting Figure 2b:** Remaining eigenvectors obtained from SVD of the data matrix. The abscissa is in the form of data points.

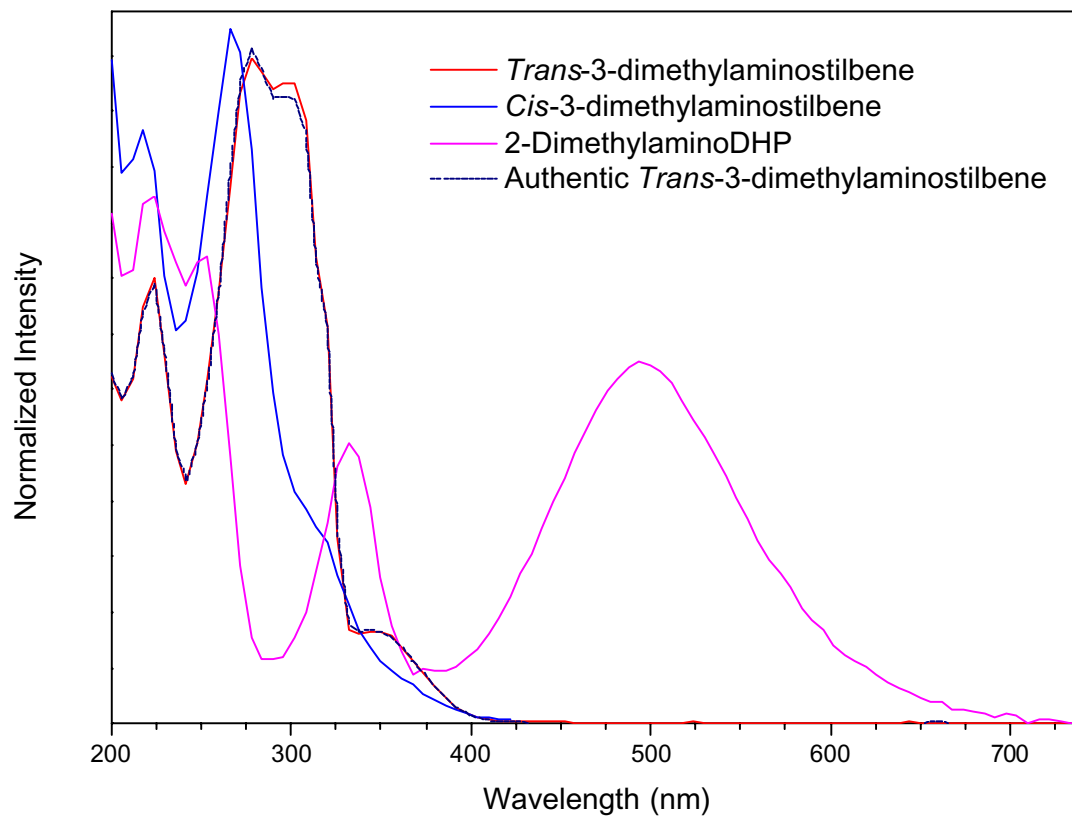

**Supporting Figure 3:** Deconvoluted data for **IIId**. The deconvoluted spectrum of *t*-**Id** is compared to that of an authentic spectrum obtained independently.

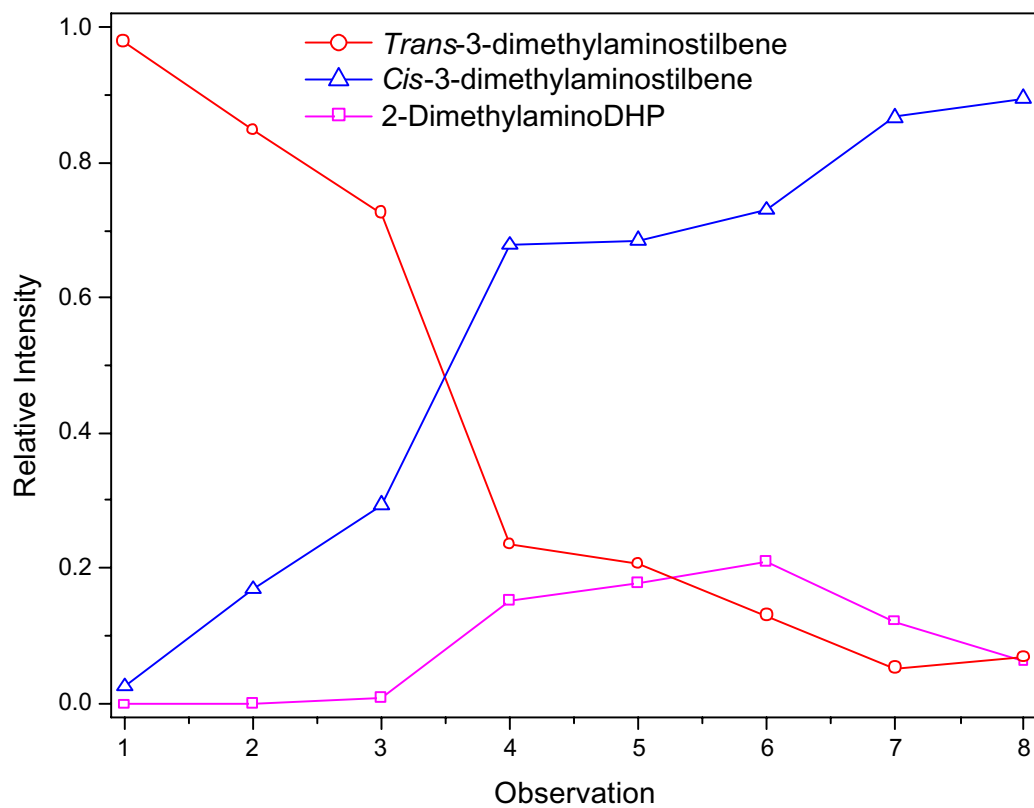

**Supporting Figure 4:** Concentration vectors for *t*-Id, *c*-Id and Id. The abscissa is not linear time of irradiation time and is not adjusted for other parameters such as light intensity.

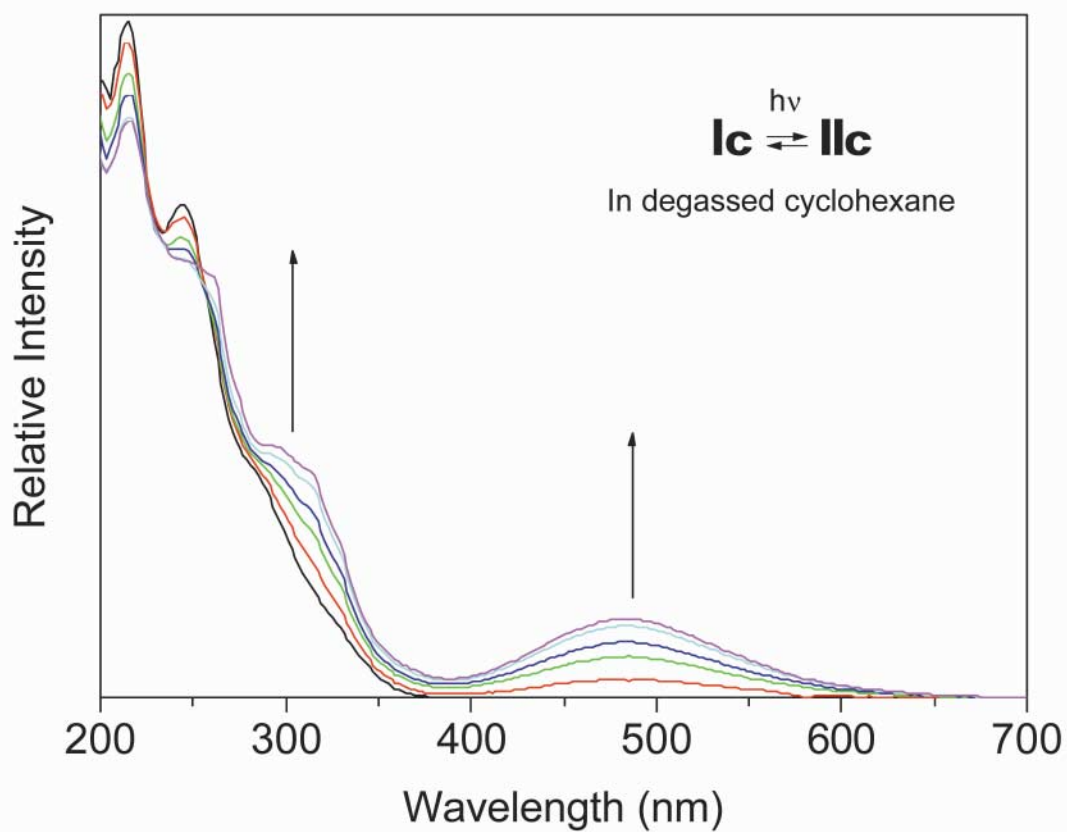

**Supporting Figure 5:** Data matrix for **Ic**. Data was collected at arbitrary intervals of irradiation time and was not adjusted for parameters such as light intensity.

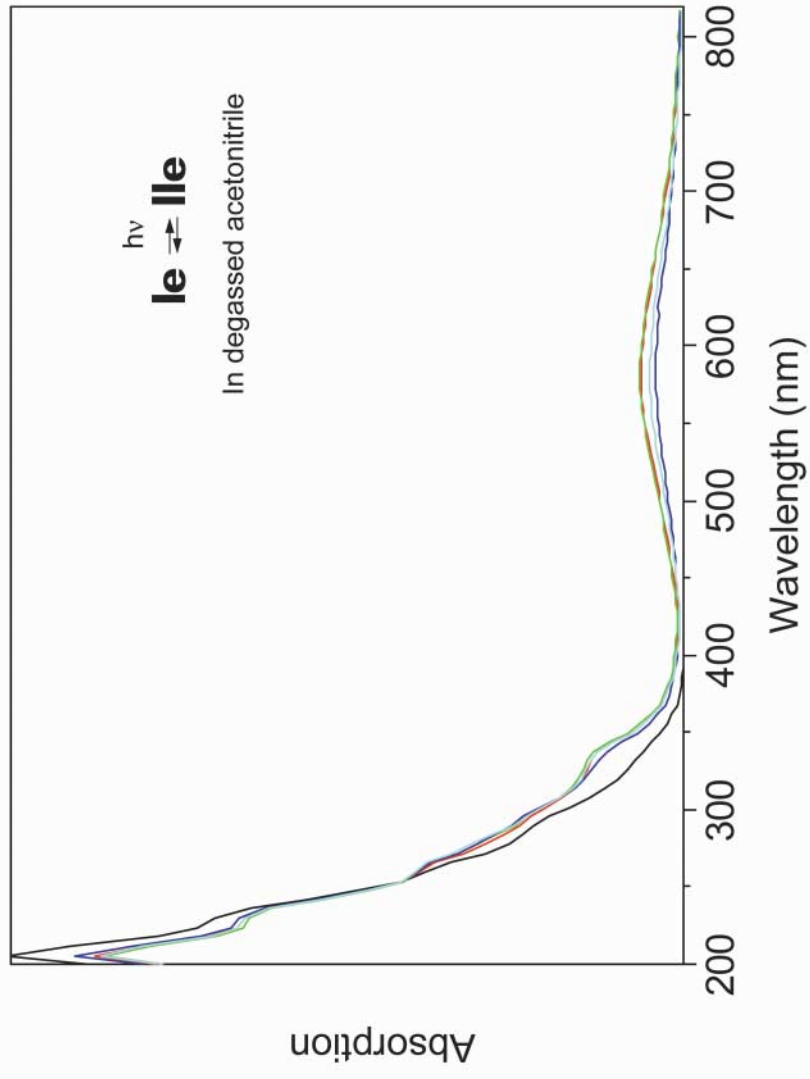

**Supporting Figure 6:** Data matrix for **le**. Data was collected at arbitrary intervals of irradiation time and was not adjusted for parameters such as light intensity.
